# Supplementary material for: A bioactive multifunctional dressing with simultaneous visible monitoring of pH values and H2O2 concentrations for promoting diabetic wound healing
Source: Royal Society of Chemistry journal article supplement (doi:10.1039/d4mh01142b), 2024-10-18
Supplement: d4mh01142b1.pdf [file d4mh01142b1.pdf]

## Supporting Information

### **Bioactive multifunctional dressing with simultaneous visible monitoring pH value and H<sub>2</sub>O<sub>2</sub> concentration for promoting diabetic wound healing**

*Jimin Huang, Jinzhou Huang, XinXin Zhang, Qinyi Xie, Yi Zheng, Chaoqin Shu, Zhe Shi, Xiao Wang, Jiajie Chen, Bing Ma, Chengtie Wu, Yufang Zhu \**

<sup>a</sup> State Key Laboratory of High Performance Ceramics and Superfine Microstructure  
Shanghai Institute of Ceramics, Chinese Academy of Sciences  
1295 Dingxi Road, Shanghai 200050, P.R. China

\*Prof. Yufang Zhu, Email: [zjf2412@163.com](mailto:zjf2412@163.com)

<sup>b</sup> Center of Materials Science and Optoelectronics Engineering  
University of Chinese Academy of Sciences  
19A Yuquan Road, Beijing 100049, P. R. China

<sup>c</sup> School of Pediatrics, Chongqing Medical University  
136 Zhongshan 2nd Road, Chongqing 400014, P. R. China

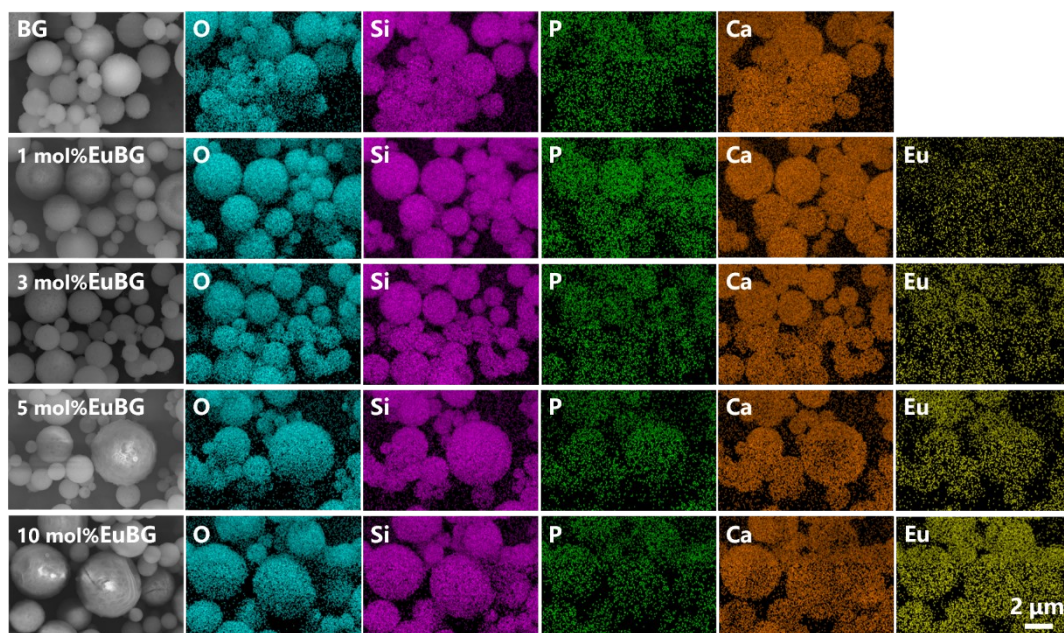

**Figure S1.** SEM-EDS elemental mappings of x mol%EuBG particles (x=0, 1, 3, 5, 10).

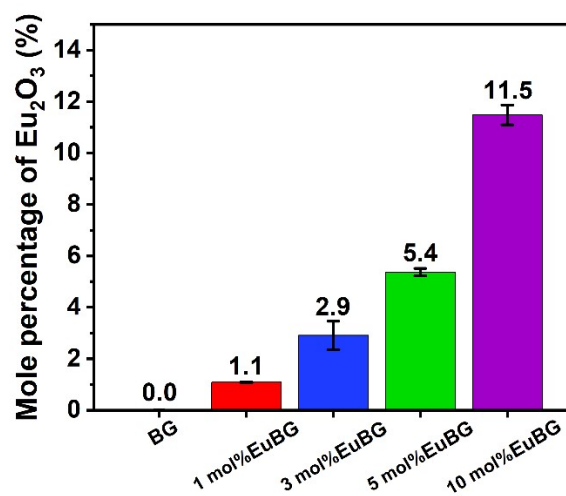

**Figure S2.** Actual mole percentage of  $\text{Eu}_2\text{O}_3$  in x mol%EuBG particles obtained by ICP testing (x=0, 1, 3, 5, 10).

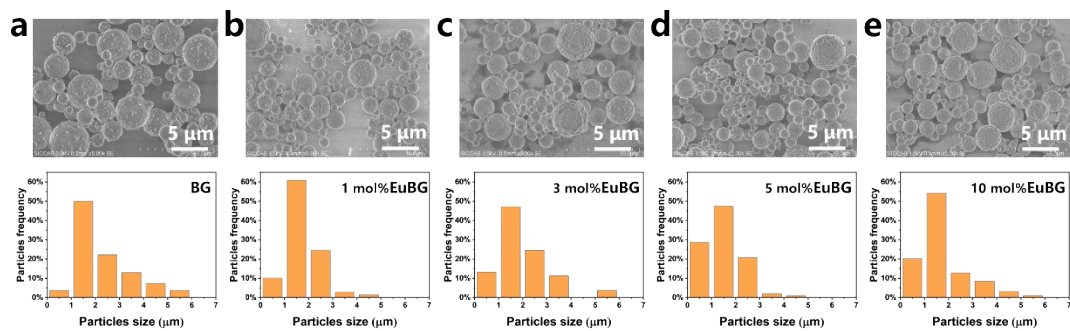

**Figure S3.** Particle size distribution of  $x$  mol%EuBG particles ( $x=0, 1, 3, 5, 10$ ) obtained by ImageJ statistics.

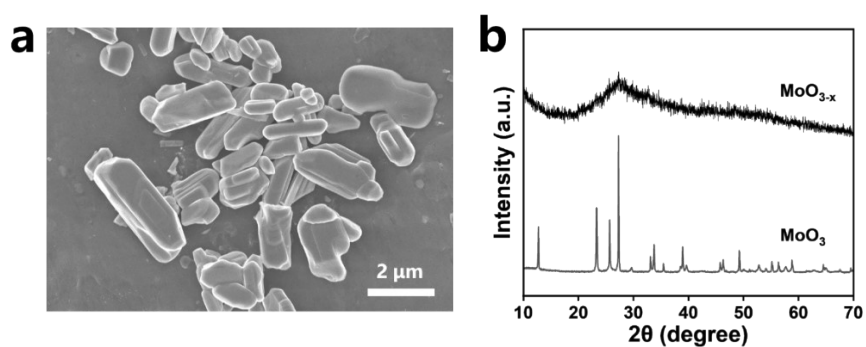

**Figure S4.** (a) SEM image of  $\text{MoO}_3$  powders. (b) XRD patterns of  $\text{MoO}_3$  powders and  $\text{MoO}_{3-x}$  nanosheets.

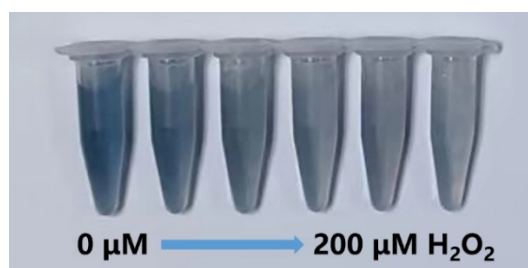

**Figure S5.** Visible color changes of the  $\text{MoO}_{3-x}$  nanosheet solutions with different concentration of  $\text{H}_2\text{O}_2$  (0-200  $\mu\text{mol L}^{-1}$ ).

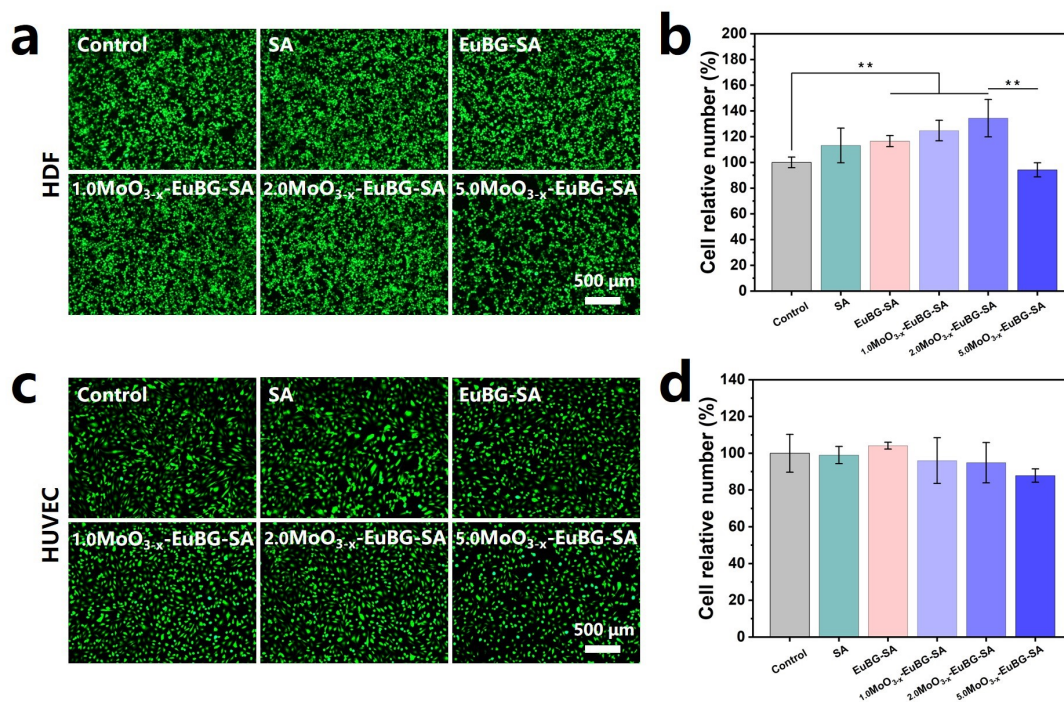

**Figure S6.** Live/dead staining images and corresponding cell relative number of (a, b) HDFs and (c, d) HUVECs (n=4). All data are expressed as means  $\pm$  standard deviation, one-way ANOVA with Bonferroni multiple comparison corrections, \*\*p < 0.01.

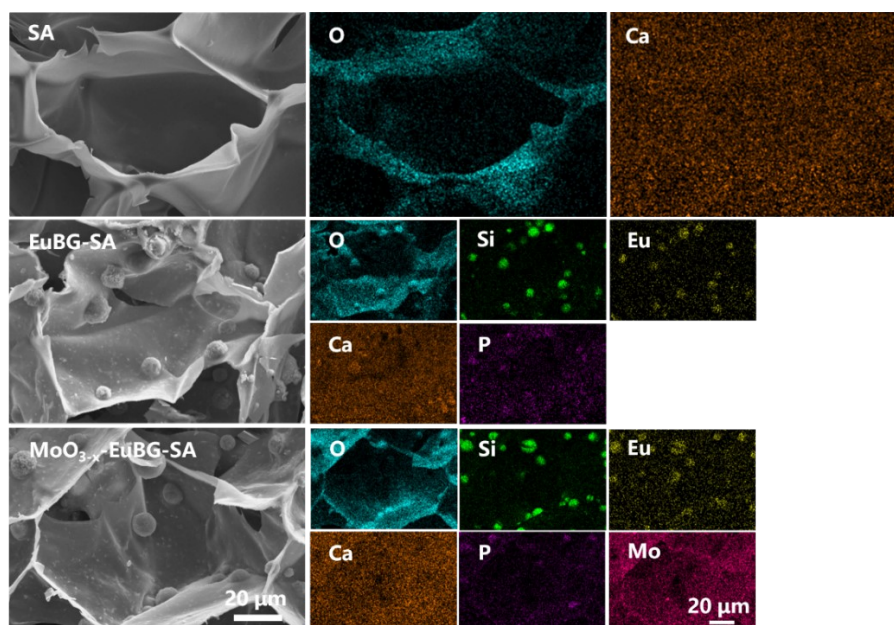

**Figure S7.** SEM-EDS elemental mappings of the inside of SA, EuBG-SA, and MoO<sub>3-x</sub>-EuBG-SA dressings.



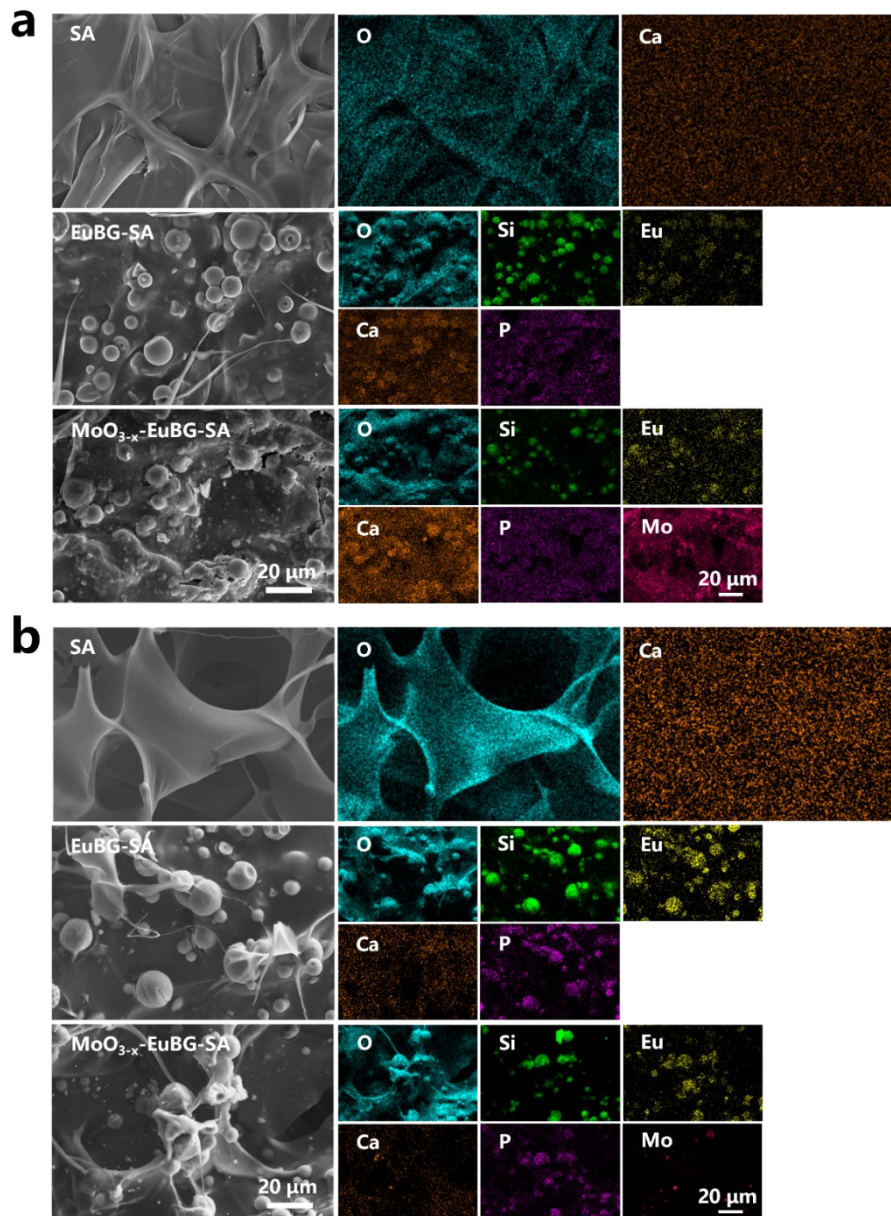

**Figure S8.** SEM-EDS elemental mappings of the surface of SA, EuBG-SA, and MoO<sub>3-x</sub>-EuBG-SA dressings (a) before and (b) after immersing in Tris-HCl (pH=7.4) for 5 days.

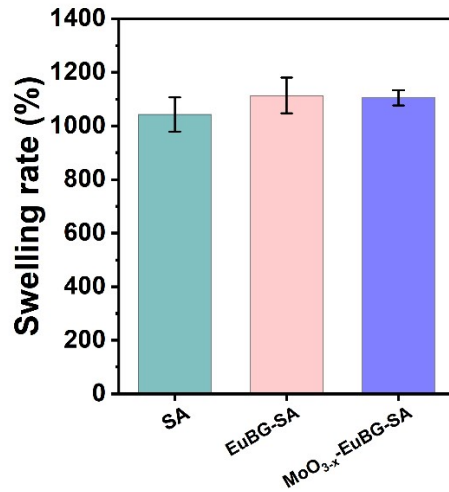

**Figure S9.** The swelling rate of SA, EuBG-SA, and MoO<sub>3-x</sub>-EuBG-SA dressings (n=6). All data are expressed as means ± standard deviation.

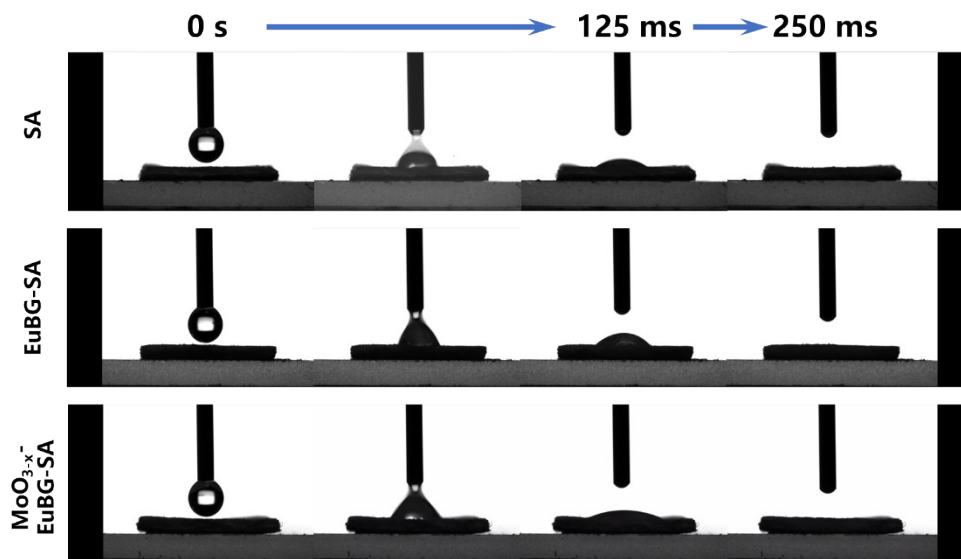

**Figure S10.** Hydrophilicity tests of SA, EuBG-SA, and MoO<sub>3-x</sub>-EuBG-SA dressings.

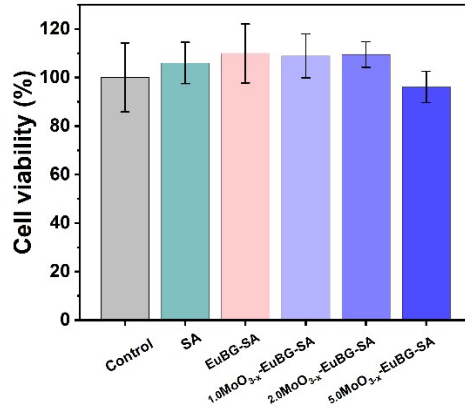

**Figure S11.** Cell viability of RAW 264.7 cultured with MoO<sub>3-x</sub>-EuBG-SA dressings, (n=5). All data are expressed as means ± standard deviation.

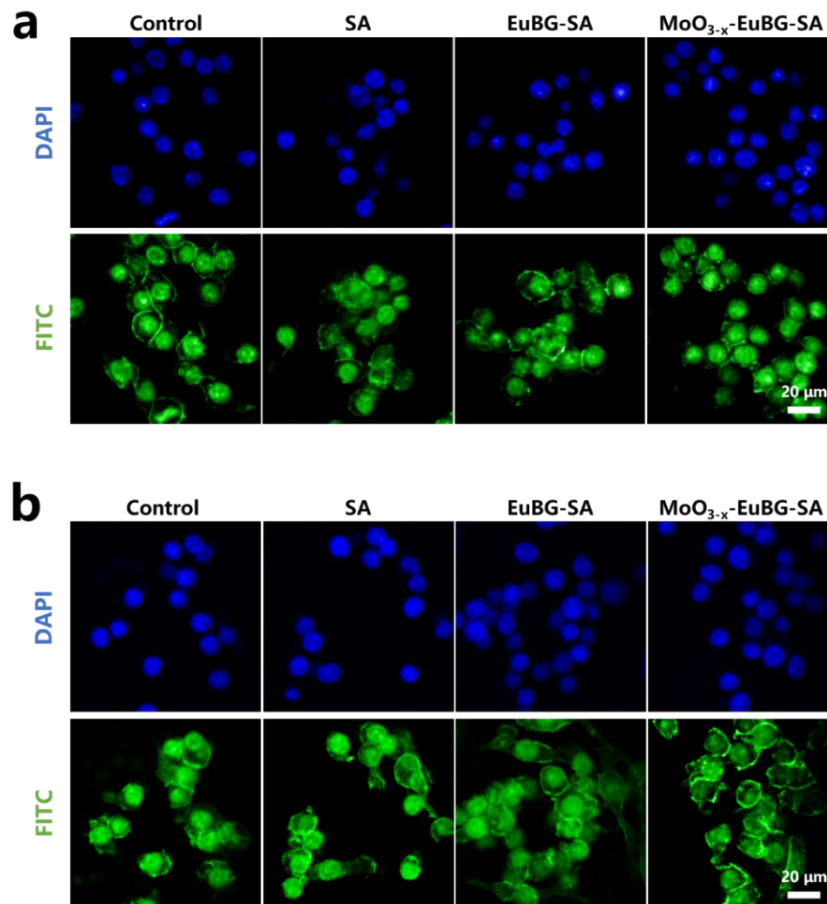

**Figure S12.** The representative (a) Arg-1 and (b) TNF- $\alpha$  fluorescence images of the RAW 264.7 cells (blue: cell nuclei; green: cytoskeleton).

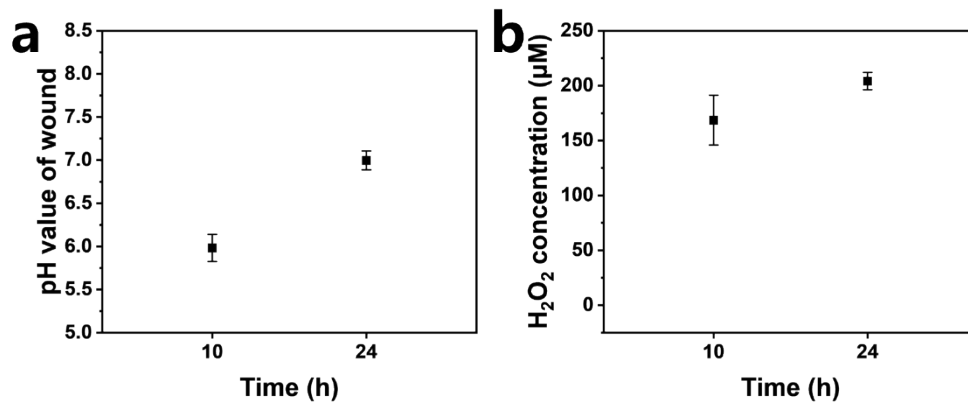

**Figure S13.** pH value and H<sub>2</sub>O<sub>2</sub> concentration of mice wound, n=4. All data are expressed as means ± standard deviation.

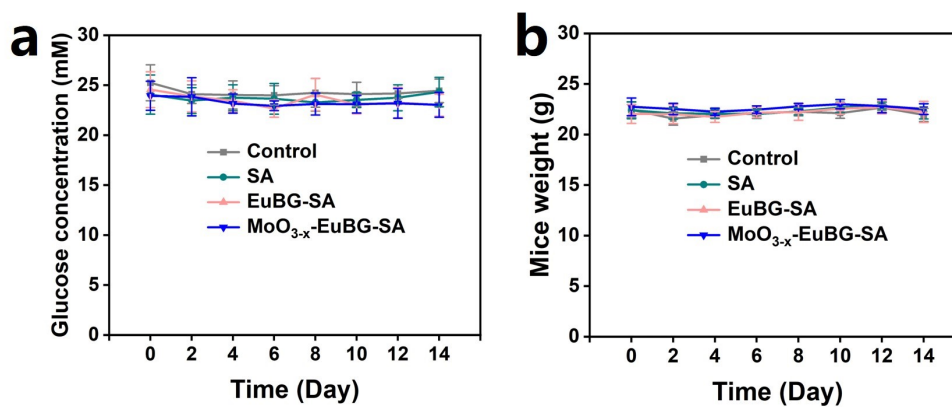

**Figure S14.** (a) Glucose concentrations in blood and (b) diabetes mice weight from day 0 to day 14 after injury (n=5). All data are expressed as means ± standard deviation.



**Table S1.** Primers sequences for RT-qPCR.

| Gene             | Primer sequence          |
|------------------|--------------------------|
| GADPH F          | GATTTGGTCGTATTGGGCG      |
| GADPH R          | CTGGAAGATGGTGATGG        |
| VEGF F           | TATGCGGATCAAACCTCACCA    |
| VEGF R           | CACAGGGATTTTTCTTGTCTTGCT |
| HIF-1 $\alpha$ F | ATCCATGTGACCATGAGGAAAT   |
| HIF-1 $\alpha$ R | CTCGGCTAGTTAGGGTACACTT   |
| bFGFR F          | GACGGCTCCTACCTCAA        |
| bFGFR R          | GCTGTAGCCCATGGTGTTG      |

**Table S2.** Primers sequences for RT-qPCR.

| Gene            | Primer sequence          |
|-----------------|--------------------------|
| GADPH F         | AGAACATCATCCCTGCATCCAC   |
| GADPH R         | TCAGATCCACGACGGACACA     |
| TNF- $\alpha$ F | CTGTAGCCCACGTCGTAGCAA    |
| TNF- $\alpha$ R | TGTCTTTGAGATCCATGCCGTT   |
| iNOS F          | CAGAAGTGCAAAGTCTCAGACAT  |
| iNOS R          | GTCATCTTGTATTGTTGGGCT    |
| Arg-1 F         | AACCTTGGCTTGCTTCGGAACTC  |
| Arg-1 R         | GTTCTGTCTGCTTTGCTGTGATGC |
| CD206 F         | ATCCACGAGCAAATGTACCTCA   |
| CD206 R         | TAGCCAGTTCAGATACCGGAA    |
